# Supplementary material for: The mtDNA D-Loop Legacy of Cattle: Fluctuations in Diversity from the Neolithic to Early Medieval Times in Switzerland
Source: MDPI journal article supplement (doi:10.3390/d15050687), 2023-05-19
Supplement: s1 [file s1]

Archive with 6 entries (6 files):
- Supplemental Text 1.pdf
- Supplemental Text 2.pdf
- Table S1 sample informations.xlsx
- Table S2 primer.xlsx
- Table S3 SNPs.xlsx
- Table S4 Amova.pdf
