# Supplementary material for: The mtDNA D-Loop Legacy of Cattle: Fluctuations in Diversity from the Neolithic to Early Medieval Times in Switzerland
Source: MDPI journal article supplement (doi:10.3390/d15050687), 2023-05-19
Supplement: s1 [file s1 › Supplemental Text 2.pdf]

## The mtDNA d-loop legacy of cattle: Fluctuations in diversity from the Neolithic to Early Medieval times in Switzerland

1. Stopp, B. Archäozoologische Untersuchung der Tierknochen aus Gruben der spätlatènezeitlichen Siedlung Basel-Gasfabrik, Grabung 1989/5. In: P. Jud, Die Töpferin und der Schmied. Basel-Gasfabrik, Grabung 1989/5. *Materialhefte zur Archäologie in Basel* **2008**, 20A, 249-292.
2. Bopp-Ito, M.; Deschler-Erb, S.; Vach, W.; Schibler, J. Size diversity in Swiss Bronze Age cattle. *International Journal of Osteoarchaeology* **2018**, 28, 294-304, doi:10.1002/oa.2654.
3. Furger, A.R.; Deschler-Erb, S. Das Fundmaterial aus der Schichtfolge beim Augster Theater. *Forschungen in Augst* **1992**, 15, 455-461.
4. Deschler-Erb, S. Neue Erkenntnisse zur vertikalen und horizontalen Fundverteilung in einer Augster Stadtinsula. Die Tierknochenfunde aus der Insula 23 (Grabung 1987/56). *Jahresberichte aus Augst und Kaiseraugst* **1991**, 12, 305-379.
5. Schibler, J.; Elsner, J.; Schlumbaum, A. Incorporation of aurochs into a cattle herd in Neolithic Europe: single event or breeding? *Scientific Reports* **2014**, 4:5798., <https://doi.org/10.1038/srep05798>
6. Schlumbaum, A.; Turgay, M.; Schibler, J. Near East mtDNA haplotype variants in Roman cattle from Augusta Raurica, Switzerland, and the Swiss Evolène breed. *Animal Genetics* **2006**, 37, 373-375. <https://doi.org/10.1111/j.1365-2052.2006.01435.x>.
7. Stampfli, H.R. Tierknochenfunde. In *Die Siedlungsreste der Horgener Kultur*, Furger, A.R., Ed. Staatlicher Lehrmittelverlag: Bern, 1980; Vol. 7, pp. 141-160.
8. Frosdick, R. Status and New Beginnings; Archaeozoological research into the Early Medieval rural settlements of Northwest Switzerland. Revised 2nd edition. University of Basel 2014, Basel, 2017.
9. *Kastelen 2 : Die Alteren Steinbauten in den Insulae 1 Und 2 von Augusta Raurica*. Sütterlin, H., Ed.; 1999; Vol. 22.
10. Marti, R. Landwirtschaft lohnt sich – Goldfunde aus der römischen Villa rustica von Pratteln, Kästeli. In *50 Jahre - 50 Funde*, Marti, R., Fischer, A., Eds. Archäologie im Kanton Baselland: 2018; pp. 74-75.
11. Anderson, S.; de Bruijn, M.H.L.; Coulson, A.R.; Eperon, I.C.; Sanger, F.; Young, I.G. Complete sequence of bovine mitochondrial DNA. Conserved features of the mammalian mitochondrial genome. *Journal of Molecular Biology* **1982**, 156, 683-717. [https://doi.org/10.1016/0022-2836\(82\)90137-1](https://doi.org/10.1016/0022-2836(82)90137-1).
12. Edwards, C.J.; MacHugh, D.E.; Dobney, K.M.; Martin, L.; Russell, N.; Horwitz, L.K.; McIntosh, S.K.; MacDonald, K.C.; Helmer, D.; Tresset, A., et al. Ancient DNA analysis of 101 cattle remains: limits and prospects. *Journal of Archaeological Science* **2004**, 31, 695-710. <https://doi.org/10.1016/j.jas.2003.11.001>.
13. Colominas, L.; Schlumbaum, A.; Sana, M. The impact of the Roman Empire on animal husbandry practices: study of the changes in cattle morphology in the north-east of the

- Iberian Peninsula through osteometric and ancient DNA analyses. *Archaeological and Anthropological Sciences* **2014**, 6, 1-16.
14. Scheu, A.; Hartz, S.; Schmölcke, U.; Tresset, A.; Burger, J.; Bollongino, R. Ancient DNA provides no evidence for independent domestication of cattle in Mesolithic Rosenhof, Northern Germany. *Journal of Archaeological Science* **2008**, 35, 1257-1264.  
<https://doi.org/10.1016/j.jas.2007.08.012>.
  15. Bollongino, R.; Burger, J.; Powell, A.; Mashkour, M.; Vigne, J.-D.; Thomas, M.G. Modern Taurine Cattle Descended from Small Number of Near-Eastern Founders. *Molecular Biology and Evolution* **2012**, 29, 2101-2104, <https://doi.org/10.1093/molbev/mss092>.
  16. Granado, J.; Harmath, M.; Tecchiati, U.; Oeggel, K.; Schibler, J.; Schlumbaum, A. MtDNA D-Loop Diversity in Alpine Cattle during the Bronze Age. *Diversity* **2021**, 13, 449.  
<https://doi.org/10.3390/d13090449>.
  17. Bonfiglio, S.; Ginja, C.; Gaetano, A.; Achilli, A.; Olivieri, A.; Colli, L. Origin and spread of *Bos taurus*: new clues from mitochondrial genomes belonging to haplogroup T1. *PLoS One* **2012**, 7, <https://doi.org/10.1371/journal.pone.0038601>.
  18. Achilli, A.; Bonfiglio, S.; Olivieri, A.; Malusa, A.; Pala, M.; Hooshier Kashani, B. The multifaceted origin of taurine cattle reflected by the mitochondrial genome. *PLoS One* **2009**, 4, <https://doi.org/10.1371/journal.pone.0005753>.
  19. Schucany, C.; Mattmann, T. Die Keramik von Augusta Raurica: Typologie und Chronologie. *Forschungen in Augst* **2019**, 42, 481p.
