# Supplementary material for: The mtDNA D-Loop Legacy of Cattle: Fluctuations in Diversity from the Neolithic to Early Medieval Times in Switzerland
Source: MDPI journal article supplement (doi:10.3390/d15050687), 2023-05-19
Supplement: s1 [file s1 › Table S1 sample informations.xlsx]

## Sheet: Tabelle1
Table S1: Archaeological, archaeozoological and genetic details of cattle samples investigated for this study. Period classifications are Ho = Horgen, CW = Corded Ware, BA = Bronze Age, IA = Late Iron Age, Roman periods: R1 = 1st half of 1st century CE, R2 = 2nd half of 1st century CE, R3 = 2nd century CE, R4 = 3rd to 4th century CE, EEM = Early Early Medieval time from 5th to 7th century CE, LEM…
no.	Labcode	archeological code	excavation code/year of excavation	sceletal element	preservation	dating	phase or period	period classification	mtDNA d-loop haplogroup	Accession Number	genetic results obtained	citations
	Twann Bahnhof
1	LBS002	2130B	1975-1976	tibia	waterlogged	3093-3072 cal BCE	upper Horgen OH	Ho	cf T1	OQ446403	this study	Stampfli 1980
2	LBS005	2130A	1975-1976	metacarpus	waterlogged	3093-3072 cal BCE	upper Horgen OH	Ho	cf T1	OQ446404	this study	Stampfli 1980
3	LBS006	2210.6	1975-1976	humerus	waterlogged	3093-3072 cal BCE	upper Horgen OH	Ho	T3	OQ446405	this study	Stampfli 1980
4	LBS007	2237.2	1975-1976	tibia	waterlogged	3093-3072 cal BCE	upper Horgen OH	Ho	T3	OQ446406	this study	Stampfli 1980
5	LBS015	2113.1	1975-1976	astragalus	waterlogged	3093-3072 cal BCE	upper Horgen OH	Ho	T3	OQ446407	this study	Stampfli 1980
6	LBS016	2130.1	1975-1976	astragalus	waterlogged	3093-3072 cal BCE	upper Horgen OH	Ho	cf T1	OQ446408	this study	Stampfli 1980
7	TWB44	2048.1	1975-1976	metacarpus	waterlogged	3093-3072 cal BCE	upper Horgen OH	Ho	P		Schibler et al. 2014	Stampfli 1980
	Zürich Versicherung Mythenquai
8	ZHV9	1131	2017	scapula	waterlogged	2720-2690 cal BCE	Corded Ware	CW	Q	OQ446369	this study	Archaeological Service Canton Zürich, Unterwasserarchäologie und Dendroarchäologie, Niels Bleicher Note N° 1929
9	ZHV14	1142	2017	femur	waterlogged	2720-2690 cal BCE	Corded Ware	CW	T3	OQ446370	this study	Archaeological Service Canton Zürich, Unterwasserarchäologie und Dendroarchäologie, Niels Bleicher Note N° 1929
10	ZHV16	1129	2017	mandibula	waterlogged	2720-2690 cal BCE	Corded Ware	CW	T3	OQ446371	this study	Archaeological Service Canton Zürich, Unterwasserarchäologie und Dendroarchäologie, Niels Bleicher Note N° 1929
11	ZHV28	1138	2017	metatarsus	waterlogged	2720-2690 cal BCE	Corded Ware	CW	T2	OQ446372	this study	Archaeological Service Canton Zürich, Unterwasserarchäologie und Dendroarchäologie, Niels Bleicher Note N° 1929
12	ZHV29	1138	2017	metatarsus	waterlogged	2720-2690 cal BCE	Corded Ware	CW	T3	OQ446373	this study	Archaeological Service Canton Zürich, Unterwasserarchäologie und Dendroarchäologie, Niels Bleicher Note N° 1929
	Savognin Padnal
13	MH1	73-155 421/D	1971-1983	M3	dry	1450 - 1350/1300 BCE	Middle BA	BA	T3	MT423762	Granado et al. 2021	Bopp-Ito et al. 2018
14	MH2	73-93 22/B	1971-1983	M3	dry	1350/1300 - 900/800 BCE	Late BA	BA	T3	MT423749	Granado et al. 2021	Bopp-Ito et al. 2018
15	MH3	75-23b 411/D	1971-1983	M3	dry	1450 - 1350/1300 BCE	Middle BA	BA	T3	MT423753	Granado et al. 2021	Bopp-Ito et al. 2018
16	MH4	76-9b 54/E	1971-1983	M3	dry	1950/1900 - 1550/1450 BCE	Early BA/beginning Middle BA	BA	T2	MT423732	Granado et al. 2021	Bopp-Ito et al. 2018
17	MH7	SP76/126 51 143/E	1971-1983	M3	dry	1950/1900 - 1550/1450 BCE	Early BA/beginning Middle BA	BA	Q	MT423733	Granado et al. 2021	Bopp-Ito et al. 2018
18	MH8	55/C	1971-1983	M3	dry	1450 - 1350/1300 BCE	Middle BA	BA	T3	MT423750	Granado et al. 2021	Bopp-Ito et al. 2018
19	MH9	SP76/189/E	1971-1983	M3	dry	1950/1900 - 1550/1450 BCE	Early BA/beginning Middle BA	BA	T3	MT423752	Granado et al. 2021	Bopp-Ito et al. 2018
20	MH10	SP72/120-23/B	1971-1983	M3	dry	1350/1300 - 900/800 BCE	Late BA	BA	T3	MT423760	Granado et al. 2021	Bopp-Ito et al. 2018
21	MH13	SP73/102-22/B	1971-1983	M3	dry	1350/1300 - 900/800 BCE	Late BA	BA	T3	MT423759	Granado et al. 2021	Bopp-Ito et al. 2018
22	MH14	SP73/96-201/B	1971-1983	M3	dry	1350/1300 - 900/800 BCE	Late BA	BA	T3	MT423761	Granado et al. 2021	Bopp-Ito et al. 2018
23	MH15	SP76/9(b) HZ-54/E	1971-1983	M3	dry	1950/1900 - 1550/1450 BCE	Early BA/beginning Middle BA	BA	T3	MT423747	Granado et al. 2021	Bopp-Ito et al. 2018
24	MH17	SP73/150-201/B	1971-1983	M3	dry	1350/1300 - 900/800 BCE	Late BA	BA	T3	MT423763	Granado et al. 2021	Bopp-Ito et al. 2018
25	MH18	75-141b 52/E	1971-1983	M3	dry	1950/1900 - 1550/1450 BCE	Early BA/beginning Middle BA	BA	T3	MT423764	Granado et al. 2021	Bopp-Ito et al. 2018
26	MH19	SP75/166-411/D	1971-1983	M3	dry	1450 - 1350/1300 BCE	Middle BA	BA	T3	MT423765	Granado et al. 2021	Bopp-Ito et al. 2018
27	MH20	SP73/166-202/B	1971-1983	M3	dry	1350/1300 - 900/800 BCE	Late BA	BA	Q	MT423734	Granado et al. 2021	Bopp-Ito et al. 2018
28	MH22	75-20b 401/D	1971-1983	M3	dry	1450 - 1350/1300 BCE	Middle BA	BA	T3	MT423748	Granado et al. 2021	Bopp-Ito et al. 2018
29	MH23	SP73-108 202.1 (black)/B	1971-1983	M3	dry	1350/1300 - 900/800 BCE	Late BA	BA	T3	MT423766	Granado et al. 2021	Bopp-Ito et al. 2018
30	MH24	SP73-108 202.2 (red)/B	1971-1983	M3	dry	1350/1300 - 900/800 BCE	Late BA	BA	T3	MT423751	Granado et al. 2021	Bopp-Ito et al. 2018
31	Padnal 78	collected by hand	1971-1983	horncore sin	dry	1950/1900 - 1550/1450 BCE	Early BA/beginning Middle BA	BA	T2	MT423735	Granado et al. 2021	Bopp-Ito et al. 2018
	Basel Gasfabrik
32	LB6 RBG7	25118	1992/1	tibia	dry	170/150 - 100/90 BCE	Late Iron Age	IA	T3	OQ446331	this study	unpublished
33	LB7 RBG10	25073	1992/1	humerus	dry	170/150 - 100/90 BCE	Late Iron Age	IA	T3	OQ446332	this study	unpublished
34	LB1 RB12	18921	1989/5	metatarsus	dry	170/150 - 100/90 BCE	Late Iron Age	IA	T3	OQ446333	this study	Stopp 2008
35	LB11 RBG5	25139	1992/1	metatarsus	dry	170/150 - 100/90 BCE	Late Iron Age	IA	T3	OQ446334	this study	unpublished
36	LB5 RBG8	25106	1992/1	tibia	dry	170/150 - 100/90 BCE	Late Iron Age	IA	T3	OQ446335	this study	unpublished
	Augst Theater NW Ecke, 1986-1987.54**
37	TKH1	C04158	1987.05	metacarpus	dry	2 - ca. 10 CE	Phase 1	R1	T3	OQ446347	this study	Furger and Deschler-Erb 1992, Figure 244
38	TKH3	C04264	1987.05	metacarpus	dry	10/15 - 30/40 CE	Phase 2	R1	T3	OQ446348	this study	Furger and Deschler-Erb 1992, Figure 244
40	B18	C04261	1987.05	metacarpus proximal	dry	10 - 30/40 CE	Phase 2	R1	T3	OQ446388	this study	Furger and Deschler-Erb 1992, Figure 244
41	B31	C04152	1987.05	tibia distal	dry	10 - 30/40 CE	Phase 2	R1	T3	OQ446394	this study	Furger and Deschler-Erb 1992, Figure 244
42	B13	C04260	1987.05	metatarsus proximal	dry	30/40 - 40 CE	Phase 3	R1	T3	OQ446385	this study	Furger and Deschler-Erb 1992, Figure 244
43	B15	C04260	1987.05	metacarpus distal	dry	30/40 - 40 CE	Phase 3	R1	T3	OQ446386	this study	Furger and Deschler-Erb 1992, Figure 244
44	B29	C04260	1987.05	humerus distal	dry	30/40 - 40 CE	Phase 3	R1	T3	OQ446393	this study	Furger and Deschler-Erb 1992, Figure 244
45	B32	C04260	1987.05	metacarpus distal	dry	30/40 - 40 CE	Phase 3	R1	T1	OQ446395	this study	Furger and Deschler-Erb 1992, Figure 244
46	B26	C04260	1987.05	phalanx 1	dry	30/40 - 40 CE	Phase 3	R1	T3	OQ446391	this study	Furger and Deschler-Erb 1992, Figure 244
39	TKH2	C04259	1987.05	metatarsus	dry	40 - 50/60 CE	Phase 4	R2	T3	OQ446349	this study	Furger and Deschler-Erb 1992, Figure 244
47	TKH4	C04219	1987.05	metatarsus	dry	50 - 60, latest 70 CE	Phase 5	R2	T3	OQ446350	this study	Furger and Deschler-Erb 1992, Figure 244
48	TKH5	C04221	1987.05	metacarpus	dry	70 - ca. 80 CE	Phase 9	R2	T3	OQ446351	this study	Furger and Deschler-Erb 1992, Figure 244
49	B16	C04259	1987.05	humerus distal	dry	40-50/60 CE	Phase 4	R2	T3	OQ446387	this study	Furger and Deschler-Erb 1992, Figure 244
50	B19	C04259	1987.05	phalanx 1	dry	40-50/60 CE	Phase 4	R2	T3	OQ446389	this study	Furger and Deschler-Erb 1992, Figure 244
51	B27	C04259	1987.05	phalanx 1	dry	40-50/60 CE	Phase 4	R2	T3	OQ446392	this study	Furger and Deschler-Erb 1992, Figure 244
52	B45	C04256	1987.05	metatarsus distal	dry	40-50/60 CE	Phase 5	R2	T3	OQ446401	this study	Furger and Deschler-Erb 1992, Figure 244
53	B41	C04256	1987.05	metatarsus distal	dry	40-50/60 CE	Phase 5	R2	T3	OQ446399	this study	Furger and Deschler-Erb 1992, Figure 244
54	B42	C04256	1987.05	metacarpus distal	dry	40-50/60 CE	Phase 5	R2	T3	OQ446400	this study	Furger and Deschler-Erb 1992, Figure 244
55	B40	C04254	1987.05	metatarsus proximal	dry	60/65 - latest 80 CE	Phase 6	R2	T3	OQ446398	this study	Furger and Deschler-Erb 1992, Figure 244
56	TKH6	C04217	1987.05	madibula	dry	100-120 CE	Phase 12	R3	T3	OQ446352	this study	Furger and Deschler-Erb 1992, Figure 244
57	B37	C04220	1987.05	metatarsus distal	dry	ca. 80 - 100/110 CE	Phase 10	R3	T3	OQ446396	this study	Furger and Deschler-Erb 1992, Figure 244
58	B50	C04219	1987.05	metacarpus distal	dry	ca. 100-110 CE	Phase 11	R3	T3	OQ446402	this study	Furger and Deschler-Erb 1992, Figure 244
	Augst Insula 23, 1987.56
59	B21	C04518	1987.06	metatarsus proximal	dry	0-50 CE	2	R1	T3	OQ446390	this study	Deschler-Erb 1991; Imdaseintrag: 1. H. 1. Jh. n. Chr.
	Augst Kastelen
60	B6	C08989	1992.05	metacarpus	dry	50–150 CE	mixed layer	R3	T2	AJ871616–AJ871632	Schlumbaum et al 2006	Imdaseintrag: 50-150 AD
61	B1	D941	1992.05	phalanx 1	dry	100–170 CE	2.6	R3	T3	OQ446384	this study	Sütterlin 1999
62	B4	D941	1992.05	metacarpus proximal	dry	100–170 CE	2.6	R3	T3	OQ446397	this study	Sütterlin 1999
63	B3	D941	1992.05	metacarpus distal	dry	100–170 CE	2.6	R3	T3	OQ446383	this study	Sütterlin 1999
64	TKH9	D00941	1992.05	metatarsus	dry	100–170 CE	older period of stone construction	R3	T3	OQ446353	this study	Sütterlin 1999
65	TKH10	D00941	1992.05	metatarsus	dry	100–170 CE	older period of stone construction	R3	T3	OQ446354	this study	Sütterlin 1999
66	TKH11	C08293	1991.05	metacarpus	dry	250–350 CE	fortification-period of occupation	R4	T3	OQ446355	this study	Sütterlin 1999
67	TKH12	C08334	1991.05	metacarpus	dry	200–300 CE	fortification-period of occupation	R4	T1	OQ446356	this study	Sütterlin 1999
68	TKH13	C08334	1991.05	metacarpus	dry	200–300 CE	fortification-period of occupation	R4	T3	OQ446357	this study	Sütterlin 1999
69	TKH14	C08263	1991.05	metacarpus	dry	50–300 CE	fortification-period of occupation	R4	T3	OQ446358	this study	Sütterlin 1999
70	TKH15	C08293	1991.05	mandibula	dry	250–350 CE	fortification-period of occupation	R4	T3	OQ446359	this study	Sütterlin 1999
	Pratteln Kästeli
71	KST3	C0037	2006/2009	astragalus	dry	late 3rd cent. CE	Late Roman	R4	T3	OQ446365	this study	Marti 2017
72	KST4	C0037	2006/2009	metacarpus	dry	late 3rd cent. CE	Late Roman	R4	T3	OQ446366	this study	Marti 2017
73	KST5	C0043	2006/2009	metacarpus	dry	late 3rd cent. CE	Late Roman	R4	T3	OQ446367	this study	Marti 2017
74	KST7	C0043	2006/2009	metatarsus	dry	late 3rd cent. CE	Late Roman	R4	T3	OQ446368	this study	Marti 2017
	Kaiseraugst Hotel Adler
75	TKH21	C03945	1989.01	radius	dry	Mid 4th cent. CE	Late Roman	R4	T3	OQ446363	this study	Frosdick 2017
76	TKH17	C06584	1990.01	metacarpus	dry	mid 5th - late 6th cent.CE	Early Early Medieval	EEM	T3	OQ446360	this study	Frosdick 2017
77	TKH18	C06584	1990.01	metatarsus	dry	mid 5th - late 6th cent.CE	Early Early Medieval	EEM	T3	OQ446361	this study	Frosdick 2017
78	TKH20	C07185	1990.01	radius	dry	mid 5th - late 6th cent.CE	Early Early Medieval	EEM	T3	OQ446362	this study	Frosdick 2017
79	TKH22	C06172	1989.01	mandibula	dry	mid 5th-late 6th cent.CE	Early Early Medieval	EEM	T3	OQ446364	this study	Frosdick 2017
	Reinach Brunngasse
80	MG02	D3689	56.131/2014	radius	dry	2nd half of 6th cent. CE	Early Early Medieval	EEM	T3	OQ446374	this study	Marti-Grädel unpublished
81	MG06	D2214	56.131/2014	humerus	dry	ca. 1st half–mid 7th cent. CE	Early Early Medieval	EEM	T3	OQ446375	this study	Marti-Grädel unpublished
82	MG07	D3611	56.131/2014	humerus	dry	ca. 1st half–mid 7th cent. CE	Early Early Medieval	EEM	T3	OQ446376	this study	Marti-Grädel unpublished
83	MG08	D2120-1	56.131/2014	humerus	dry	ca. 1st half–mid 7th cent. CE	Early Early Medieval	EEM	T3	OQ446377	this study	Marti-Grädel unpublished
84	MG09	D3620	56.131/2014	radius + ulna	dry	ca. 1st half–mid 7th cent. CE	Early Early Medieval	EEM	T3	OQ446378	this study	Marti-Grädel unpublished
85	MG10	D2120-2	56.131/2014	radius	dry	ca. 1st half–mid 7th cent. CE	Early Early Medieval	EEM	T3	OQ446379	this study	Marti-Grädel unpublished
86	MG11	D2215	56.131/2014	radius	dry	ca. 1st half–mid 7th cent. CE	Early Early Medieval	EEM	T3	OQ446380	this study	Marti-Grädel unpublished
87	MG12	D2155	56.131/2014	radius + ulna	dry	8th cent. CE	Late Early Medieval	LEM	T1	OQ446381	this study	Marti-Grädel unpublished
88	MG13	D3545	56.131/2014	radius	dry	8th cent. CE	Late Early Medieval	LEM	T3	OQ446382	this study	Marti-Grädel unpublished
	Reinach Alte Brauerei
89	RAG1	A0501	56.55/1989	phalanx 1 post.	dry	late 6th - early 7th cent. CE	Early Early Medieval	EEM	T3	OQ446336	this study	Frosdick 2017
90	RAG2	A0616+A0622	56.55/1989	metatarsus	dry	1st half 8th cent. CE	Late Early Medieval	LEM	T3	OQ446337	this study	Frosdick 2017
91	RAG4	A0564	56.55/1989	metatarsus	dry	2nd half 8th cent. CE	Late Early Medieval	LEM	T3	OQ446338	this study	Frosdick 2017
	Reinach Gemeindezentrum
92	RAG6	B3211	56.93/2000-2001	scapula	dry	2nd half 6th cent. CE	Early Early Medieval	EEM	T3	OQ446339	this study	Frosdick 2017
93	RAG8	B3263	56.93/2000-2002	phalanx 1 post.	dry	2nd half 6th cent. CE	Early Early Medieval	EEM	T3	OQ446340	this study	Frosdick 2017
												Frosdick 2017
	Lausen Bettenach
94	LSB1	NN0720	37.45/1985	radius + ulna	dry	late 6th–late 7th cent. CE	Early Early Medieval	EEM	T3	OQ446341	this study	Frosdick 2017
95	LSB4	A2916	37.57/1991	radius	dry	late 6th–late 7th cent. CE	Early Early Medieval	EEM	T3	OQ446342	this study	Frosdick 2017
96	LSB5	A1918	37.56/1990	metatarsus	dry	late 7th–late 8th cent. CE	Late Early Medieval	LEM	T3	OQ446343	this study	Frosdick 2017
97	LSB6	A1685	37.56/1990	metacarpus	dry	late 7th–late 8th cent. CE	Late Early Medieval	LEM	T3	OQ446344	this study	Frosdick 2017
98	LSB7	A5555	37.57/1991	phalanx 1 ant.	dry	late 7th–late 8th cent. CE	Late Early Medieval	LEM	T3	OQ446345	this study	Frosdick 2017
99	LSB8	A0712	37.49/1989	radius + ulna	dry	8th/9th cent. CE	Late Early Medieval	LEM	T1	OQ446346	this study	Frosdick 2017
