# Supplementary material for: The mtDNA D-Loop Legacy of Cattle: Fluctuations in Diversity from the Neolithic to Early Medieval Times in Switzerland
Source: MDPI journal article supplement (doi:10.3390/d15050687), 2023-05-19
Supplement: s1 [file s1 › Table S2 primer.xlsx]

## Sheet: Tabelle1
Table S2: Primer list, amplification of mitochondrial d-loop. Positions are according to V00654 (Anderson et al. 1982)
Name	Sequence 5’-3’	Position of amplicon (without primer)	Length of amplicon (without primer)	References
AN1F	ATATGCCCCATGCATATAAGC	AN1F/AN2R: 16039-16157	119 bp	Colominas et al. 2014
AN2R	ACGCGGCATGGTAATTAAGC			(= AN1Rev) Edwards et al. 2004
nested AN1Fn	GCCCCATGCATATAAGCAAG	AN1Fn/AN2Rn: 16042-16152	111 bp	(=AN2For) Edwards et al. 2004
nested AN2Rn	GGCATGGTAATTAAGCTCGTG			(=AN2R) Colominas et al. 2014
AN4F	CACGAGCTTAATTACCATGCC	AN4F/AN6R: 16174-16325	152 bp	Colominas et al. 2014
AN6R	TTAGCCATTAGTCCATCGAGATGTC
nested AN4Fn	AGCTTAATTACCATGCCGCG	AN4Fn/AN6Rn: 16177-16313	137 bp	this study
nested AN6Rn	CATCGAGATGTCTTATTTAAGAGG			this study
nested AN7Fn	ACTGTGCTGTCATACATTTGG	AN7Fn/AN8Rn: 54-178	125 bp	this study
nested AN8Rn	TGTCCTGTGACCATTGACTG			this study
H1	GCACCCTAACCAAATATTACAAACAC	H1/L2: 15903-16023	121 bp	(= BosH15902) Scheu et al. 2008
L2	GTCATGTACTTGCTTATATGCATGGG			(= BosL16024) Scheu et al. 2008
L2a	TGTACATTACCCCTTGCGTAGG	H1/L2a: 15903-15948	46 bp	Granado et al. 2021
H1a	CCATACACAGACCACAGAATGAAT	H1a/L2: 15947-16023	77 bp	Granado et al. 2021
H3	TATGCCCCATGCATATAAGCAA	H3/L4: 16041-16152	112 bp	(= BosH16040) Scheu et al. 2008
L4	CGGCATGGTAATTAAGCTCGTG			(=BosL16153) Scheu et al. 2008
L4-Ra	CTATCAAGRATGAATTTGACATAATG	H3/L4-Ra: 16041-16095	55 bp	this study
H3-Fa	GACYGTACATARTACATTATGTC	H3-Fa/L4: 16105-16152	48 bp	this study
H5	TACCATGCCGCGTGAAACCA	H5-L6: 16185-16271	87 bp	(=BosH16184) Scheu et al. 2008
L6	TGAGATGGCCCTGAAGAAAGAA			(=BosL16272) Bollongino et al. 2012
L6-Ra	ATTCATTGGATAGCGACCCCC	H5/L6-Ra: 16185-16234	50 bp	this study
H5-Fa	GATCCCTCTTCTCGCTCCG	H5-Fa/L6: 16221-16271	51 bp	this study
