# Supplementary material for: The mtDNA D-Loop Legacy of Cattle: Fluctuations in Diversity from the Neolithic to Early Medieval Times in Switzerland
Source: MDPI journal article supplement (doi:10.3390/d15050687), 2023-05-19
Supplement: s1 [file s1 › Table S3 SNPs.xlsx]

## Sheet: Tabelle1
Table S3: SNPs in mtDNA d-loop, pos. 15903 - 16338; 33-198 (V00654). Haplogroup identification after Achilli et al. 2009 and Bonfiglio et al. 2012; SNPs underlaid with grey are not included in Arlequin, Network and MDS analyses (16042-16271); * results from 2nd extract target positions 16185-16220 not reproducible
Period classification (see Table S1)	Labcode (see Table S1)	covered target region	haplogroup	SNPs deviating from T3 main haplotype
Ho	LBS002	15903-16271	cf. T1	16057 A	16113 C
Ho	LBS005	15903-16271	cf. T1	16057 A	16113 C
Ho	LBS006	15903-16271	T3
Ho	LBS007	15903-16271	T3
Ho	LBS015	15903-16271	T3
Ho	LBS016	15903-16271	cf. T1	16058 T	16113 C	16229 G
Ho	TWB44	15903-16271	P	15951 C	15953 G	15994 G	16049 T	16051 C	16058 T	16084 T	16122 C	16231 T	16255 C	16264 A
CW	ZHV9	15903-16271	Q	15921 A	15953 G	16255 C
CW	ZHV14	15903-16271	T3
CW	ZHV16	15903-16271	T3
CW	ZHV28	15903-16271	T2	16057 C	16108 C	16185 A	16255 C
CW	ZHV29	15903-16271	T3	16057 C	16121 A	16255 C
BA	MH1	15903-16271	T3
BA	MH2	15903-16271	T3	15955 T
BA	MH3	15903-16271	T3	16128 C	16147 C
BA	MH4	15903-16271	T2	16044 T	16057 C	16185 A	16255 C
BA	MH7	15903-16271	Q	15953 G	16138 C	16255 C
BA	MH8	15903-16271	T3	16141 C
BA	MH9	15903-16271	T3	15908 A	15981 A
BA	MH10	15903-16271	T3
BA	MH13	15903-16271	T3
BA	MH14	15903-16271	T3
BA	MH15	15903-16271	T3	15939 A	16104 T	16200 A
BA	MH17	15903-16271	T3
BA	MH18	15903-16271	T3
BA	MH19	15903-16271	T3
BA	MH20	15903-16271	Q	15953 G	16055 C	16255 C
BA	MH22	15903-16271	T3	16129 G
BA	MH23	15903-16271	T3
BA	MH24	15903-16271	T3	15989 A
BA	Padnal 78	15903-16271	T2	16057 C	16185 A	16255 C
IA	LB1 RB12	16042-16271	T3	16129 G
IA	LB5 RBG8	16042-16271	T3	16051 N	16207 Y	16255 N
IA	LB6 RBG7	16042-16271	T3
IA	LB7 RBG10	16042-16271	T3
IA	LB11 RBG5	16042-16271	T3
R1	B13	16042-178	T3	16248 T
R1	B15	16042-178	T3	169 G
R1	B18	16042-178	T3	169 G
R1	B21	16042-178	T3	16110 T	169 G	173G
R1	B26	16042-178	T3	16074 C	16250 G
R1	B29	16042-178	T3	169 G
R1	B31	16042-178	T3	16247 T	169G
R1	B32	16042-178	cf. T1	16113 C
R1	TKH1	15903-16271	T3	16119 C
R1	TKH3	15903-16271	T3
R2	B16	16042-178	T3
R2	B19	16042-178	T3	16139 T	169 G
R2	B27	16042-178	T3	16074 C	16250 G
R2	B40	16042-178	T3	169 G
R2	B41	16042-178	T3	16133 C	169 G
R2	B42	16042-178	T3	16085 C	16255 C	169 G	178 G
R2	B45	16042-178	T3	16135 C	106 C	169 G
R2	TKH2	15903-16271	T3	16122 C
R2	TKH4	15903-16271	T3	16085 C
R2	TKH5	15903-16271	T3
R3	B1	16042-178	T3	169G
R3	B3	16042-178	T3	16119 C	169G
R3	B4	16042-178	T3	169 G
R3	B6	16042-178	T2	16057 C	16185 A	16255 C	169 G
R3	B37	16042-178	T3	16085 C	169G
R3	B50	16042-178	T3
R3	TKH6	15903-16271	T3	16110 T
R3	TKH9	15903-16271	T3
R3	TKH10	15903-16271	T3	15939 A
R4	TKH11	15903-16271	T3
R4	TKH12	15903-16271	cf. T1	16050 T	16058 T
R4	TKH13	15903-16271	T3	15939 A
R4	TKH14	15903-16271	T3	16185 A
R4	TKH15	15903-16271	T3
R4	TKH21	15903-16271	T3	16139 T
R4	KST3	15903-16271	T3
R4	KST4	15903-16271	T3
R4	KST5	15903-16271	T3	16247 T
R4	KST7	15903-16271	T3	16022 R
EEM	TKH17	15903-16271	T3
EEM	TKH18	15903-16271	T3	15921 A	16232 T
EEM	TKH20	15903-16271	T3
EEM	TKH22	15903-16271	T3
EEM	MG02	15903-16271	T3
EEM	MG06	15903-16271	T3
EEM	MG07	15903-16271	T3	16141 C
EEM	MG08	15903-16271	T3	16195 G
EEM	MG09	15903-16271	T3
EEM	MG10	15903-16271	T3
EEM	MG11	15903-16271	T3
EEM	RAG1	15903-16271	T3	16042 C
EEM	RAG6	15903-16271	T3	15921 A
EEM	RAG8	15903-16271	T3
EEM	LSB1	15903-16271	T3
EEM	LSB4	15903-16271	T3	15965 C
LEM	MG12	15903-16271	T1	15939 A	16022 A	16050 T	16113 C	16255 C
LEM	MG13	15903-16271	T3	16247 T
LEM	RAG2	15903-16271	T3
LEM	RAG4	15903-16271	T3	16074 C
LEM	LSB5	15903-16271	T3	15961 A	16141 C	16217 C
LEM	LSB6	15903-16271	T3	16231 T
LEM	LSB7	15903-16271	T3
LEM	LSB8	15903-16271*	T1	16050 T	16113 C	16133 C	16231 T	16255 C
