# Supplementary material for: The mtDNA D-Loop Legacy of Cattle: Fluctuations in Diversity from the Neolithic to Early Medieval Times in Switzerland
Source: MDPI journal article supplement (doi:10.3390/d15050687), 2023-05-19
Supplement: s1 [file s1 › Table S4 Amova.pdf]

Table S4: AMOVA output calculated with Arlequin vers. 3.5.2.2 for the ten archaeological populations of this study. EEM = Early Early Medieval period, LEM = Late Early Medieval period, R1 – R4 = Roman periods according to Table S1, BA = Bronze Age, Ho = Horgen, CW = Corded Ware, IA = Late Iron Age

Label Population name

- 1: EEM
- 2: LEM
- 3: R1
- 4: R2
- 5: R3
- 6: R4
- 7: BA
- 8: Ho
- 9: CW
- 10: IA

Population pairwise FSTs

Distance method: Pairwise difference

|   | 1       | 2       | 3        | 4        | 5        | 6       | 7       | 8 | 9 | 10 |
|---|---------|---------|----------|----------|----------|---------|---------|---|---|----|
| 1 | 0.00000 |         |          |          |          |         |         |   |   |    |
| 2 | 0.13925 | 0.00000 |          |          |          |         |         |   |   |    |
| 3 | 0.02056 | 0.02962 | 0.00000  |          |          |         |         |   |   |    |
| 4 | 0.04594 | 0.03430 | -0.01140 | 0.00000  |          |         |         |   |   |    |
| 5 | 0.02606 | 0.04530 | -0.03387 | -0.03108 | 0.00000  |         |         |   |   |    |
| 6 | 0.01529 | 0.03876 | -0.02224 | 0.01255  | -0.02273 | 0.00000 |         |   |   |    |
| 7 | 0.03068 | 0.05858 | 0.02683  | 0.01846  | -0.03748 | 0.00151 | 0.00000 |   |   |    |

|    |          |          |          |          |          |          |          |         |         |         |
|----|----------|----------|----------|----------|----------|----------|----------|---------|---------|---------|
| 8  | 0.20702  | 0.00943  | 0.08068  | 0.08847  | 0.08299  | 0.09484  | 0.12229  | 0.00000 |         |         |
| 9  | 0.37391  | 0.07378  | 0.20996  | 0.14708  | 0.09858  | 0.23522  | 0.06969  | 0.08669 | 0.00000 |         |
| 10 | -0.01534 | -0.00596 | -0.05185 | -0.05583 | -0.07032 | -0.03351 | -0.08538 | 0.02929 | 0.16667 | 0.00000 |

FST P values

Number of permutations : 110

|    | 1               | 2               | 3               | 4               | 5               | 6               | 7               | 8               | 9               | 10 |
|----|-----------------|-----------------|-----------------|-----------------|-----------------|-----------------|-----------------|-----------------|-----------------|----|
| 1  | *               |                 |                 |                 |                 |                 |                 |                 |                 |    |
| 2  | 0.02703+-0.0139 | *               |                 |                 |                 |                 |                 |                 |                 |    |
| 3  | 0.05405+-0.0148 | 0.28829+-0.0556 | *               |                 |                 |                 |                 |                 |                 |    |
| 4  | 0.00000+-0.0000 | 0.24324+-0.0560 | 0.69369+-0.0430 | *               |                 |                 |                 |                 |                 |    |
| 5  | 0.18018+-0.0235 | 0.17117+-0.0394 | 0.89189+-0.0318 | 0.98198+-0.0096 | *               |                 |                 |                 |                 |    |
| 6  | 0.24324+-0.0408 | 0.26126+-0.0394 | 0.94595+-0.0154 | 0.45946+-0.0533 | 0.99099+-0.0030 | *               |                 |                 |                 |    |
| 7  | 0.15315+-0.0333 | 0.03604+-0.0201 | 0.09910+-0.0417 | 0.25225+-0.0264 | 0.86486+-0.0203 | 0.37838+-0.0402 | *               |                 |                 |    |
| 8  | 0.00901+-0.0091 | 0.34234+-0.0327 | 0.00901+-0.0091 | 0.03604+-0.0148 | 0.00000+-0.0000 | 0.00000+-0.0000 | 0.03604+-0.0278 | *               |                 |    |
| 9  | 0.00901+-0.0091 | 0.16216+-0.0353 | 0.02703+-0.0194 | 0.04505+-0.0152 | 0.24324+-0.0385 | 0.05405+-0.0201 | 0.09910+-0.0344 | 0.11712+-0.0237 | *               |    |
| 10 | 0.92793+-0.0196 | 0.40541+-0.0595 | 0.99099+-0.0030 | 0.95495+-0.0151 | 0.95495+-0.0151 | 0.81081+-0.0236 | 0.94595+-0.0281 | 0.44144+-0.0344 | 0.18018+-0.0429 | *  |

Matrix of significant Fst P values

Significance Level=0.0500

Number of permutations : 110

[illegible]
